# Supplementary material
Source: MDPI journal article supplement (https://www.mdpi.com/2072-4292/15/18/4613)
Supplement: s1 [file s1]

**Spatiotemporal Variations of Aerosol Optical Depth and the  
Spatial Heterogeneity Relationship of Potential Factors Based on the  
Multi-Scale Geographically Weighted Regression Model in Chinese  
National-Level Urban Agglomerations**

**Supplementary Material**

Jiaxin Yuan <sup>1,2,3</sup>, Xuhong Wang <sup>1,2,3,\*</sup>, Zihao Feng <sup>1,2,3</sup>, Ying Zhang <sup>1,2,3</sup> and Mengqianxi Yu <sup>1,2,3</sup>

<sup>1</sup> College of Urban and Environmental Sciences, Northwest University, Xi'an 710127, China

<sup>2</sup> Shaanxi Key Laboratory of Earth Surface System and Environmental Carrying Capacity, Northwest University, Xi'an 710127, China

<sup>3</sup> Shaanxi Xi'an Urban Forest Ecosystem Research Station, Northwest University, Xi'an 710127, China

\* Correspondence: jqy\_wxh@nwu.edu.cn

**Contents of this tile**

**Text S1**

**Figures S1 to S3**

**Tables S1 to S2**

**References**

## Text

### Text S1: Possible uncertainties of AOD data

In this study, the spatially continuous MCD19A2 data was used to analyze the spatial distribution and changing trend of AOD in China and urban agglomerations. To ensure the accuracy of the results, we further discuss the potential effect on the uncertainty of AOD according to the Bessel formula.

In the Google Earth Engin (GEE) database, all daily AOD product data were masked by the quality control band (AOD\_QA), while pixels containing clouds and surfaces with snow and ice were excluded. Then, these daily AODs were aggregated into monthly composite data using the weighted average method to reduce the impact of data anomalies. Using these monthly AOD data, we further estimated the AOD values for each city cluster. Firstly, the vacancy values of all urban agglomerations were eliminated, and the peripheral pixel average of 5\*5 was used to replace the vacancy values. Then, average the pixel values for each study area. It is worth noting that the missing value of each city cluster is less than 95%. These time and space averaging steps generally reduce the uncertainty of AOD quantification across urban agglomerations, according to the Bessel formula  $(\sum(\delta - \bar{\delta})^2 / \sqrt{n-1})$ ,  $n$  represents the number of samples and  $\delta$  denotes the AOD estimation error at the per-pixel scale [1-4]). Therefore, when the sample size  $n$  is large enough, the uncertainty of AOD will be reduced.

## Figures

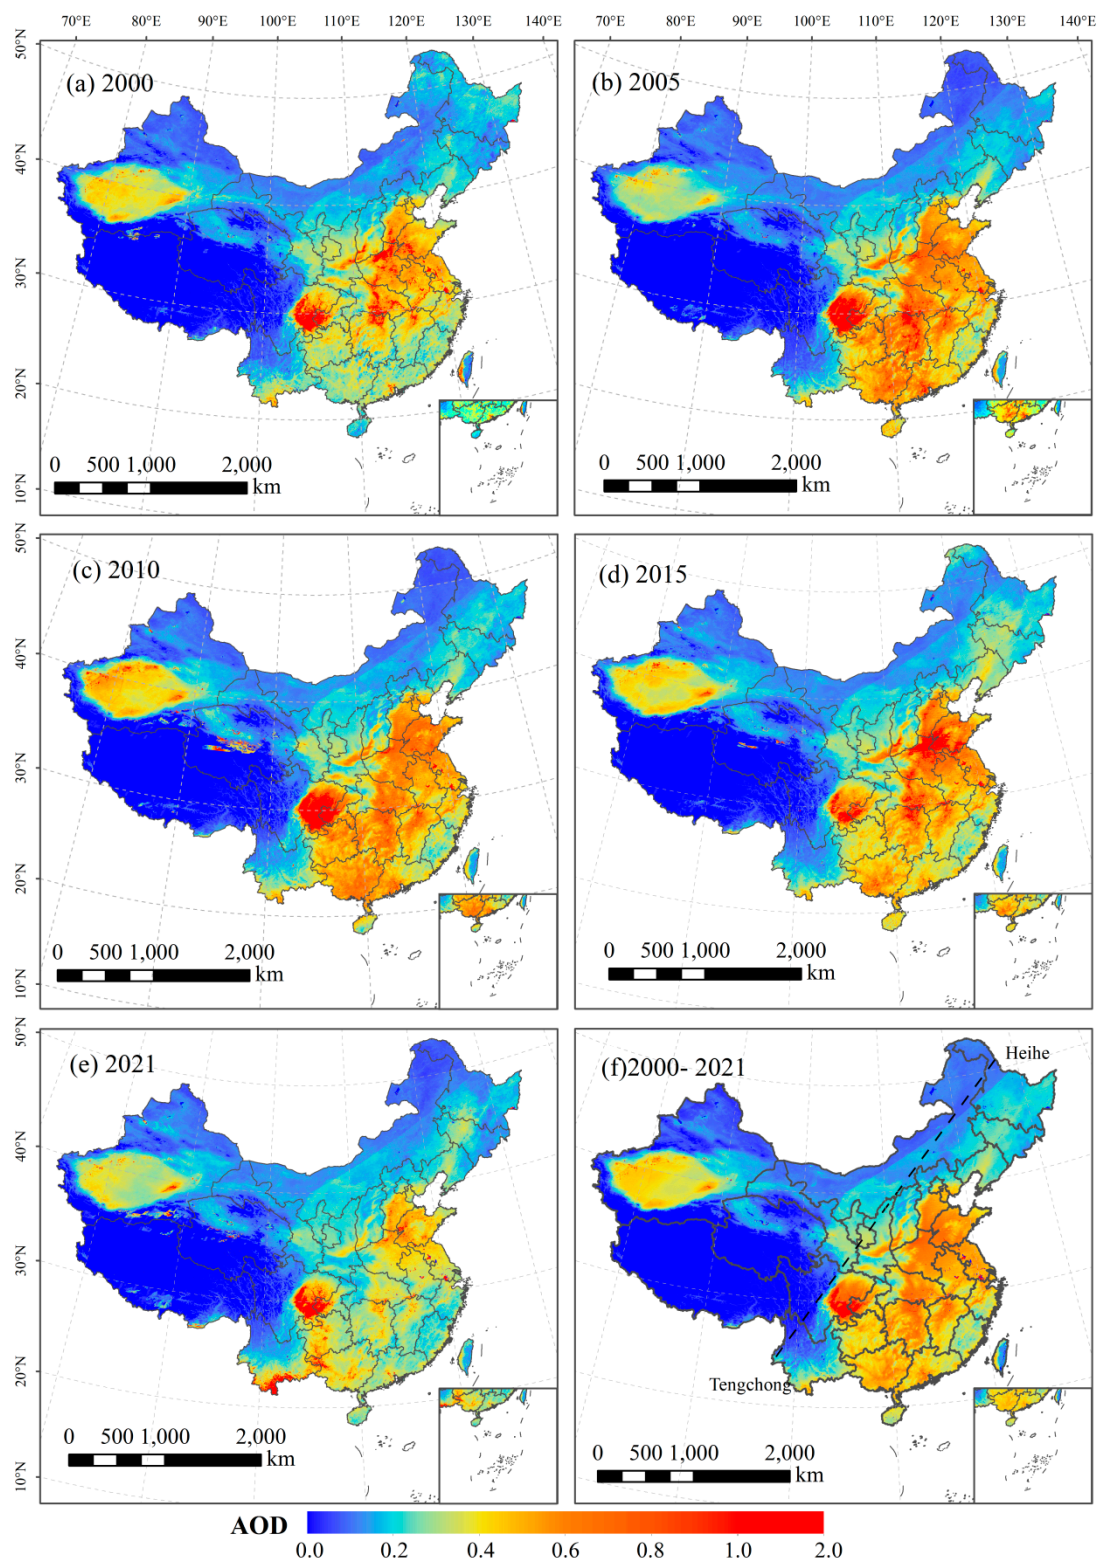

**Supplementary Figure S1.** Spatial distribution of AOD by year: (a) 2000, (b) 2005, (c) 2010, (d) 2015, (e) 2021, (f) 2000-2021.

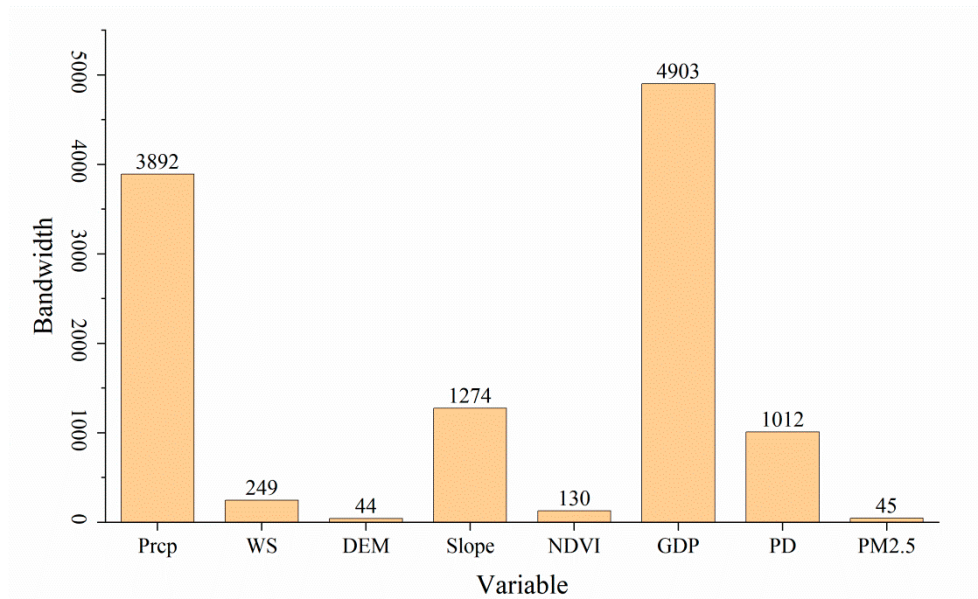

**Supplementary Figure S2.** Spatial bandwidth of all variables in MGWR model. Prcp: precipitation, WS: wind speed, DEM: digital elevation model, Slope: slope, NDVI: normalized differential vegetation index, GDP: gross domestic product, PD: population density, PM2.5: particulate matter with an aerodynamic diameter less than 2.5  $\mu\text{m}$ .

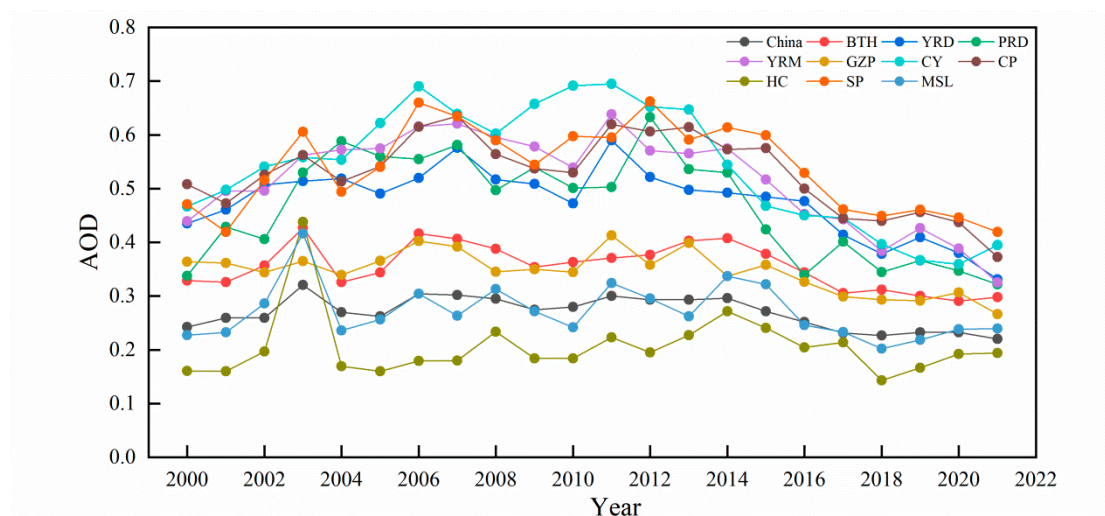

**Supplementary Figure S3.** Annual trends in the AOD in the urban agglomerations from 2000 to 2021. BTH: Beijing-Tianjin-Hebei, YRD: Yangtze River Delta, PRD: Pearl River Delta, YRM: Middle Yangtze River, GZP: Guanzhong Plain, CY: Chengdu-Chongqing, CP: Central Plains, HC: Ha-Chang, SP: Shandong Peninsula, MSL: Mid-Southern Liaoning.

## Tables

**Supplementary Table S1.** The detailed information for 10 urban agglomerations.

| urban agglomeration                                       | Location<br>(Climate conditions)                                | Area<br>(10 <sup>4</sup> km <sup>2</sup> ) | GDP<br>(billion) | Population<br>(million) |
|-----------------------------------------------------------|-----------------------------------------------------------------|--------------------------------------------|------------------|-------------------------|
| North China                                               |                                                                 |                                            |                  |                         |
| Beijing-Tianjin-Hebei<br>(BTH)                            | (Warm temperate<br>continental monsoon-type<br>climate)         | 22.6                                       | 9637.8           | 112.7                   |
| Lower Yangtze River Plain,<br>East China                  |                                                                 |                                            |                  |                         |
| Yangtze River Delta<br>(YRD)                              | (subtropical monsoon<br>climate)                                | 21.3                                       | 23841.3          | 166                     |
| South China                                               |                                                                 |                                            |                  |                         |
| Pearl River Delta<br>(PRD)                                | (Tropical monsoon climate)                                      | 5.6                                        | 12632.5          | 86                      |
| Central China, the middle<br>reaches of the Yangtze River |                                                                 |                                            |                  |                         |
| Middle Yangtze Rive<br>(YRM)                              | (subtropical monsoon<br>climate)                                | 31.7                                       | 10598.9          | 130                     |
| Upper Yangtze River area,<br>Sichuan Basin                |                                                                 |                                            |                  |                         |
| Chengdu-Chongqing<br>(CY)                                 | (subtropical monsoon<br>climate)                                | 18.5                                       | 6959.9           | 95                      |
| Central and Eastern China                                 |                                                                 |                                            |                  |                         |
| Central Plains<br>(CP)                                    | (Temperate monsoon<br>climate & subtropical<br>monsoon climate) | 28.6                                       | 8878.4           | 160                     |
| East China                                                |                                                                 |                                            |                  |                         |
| Shandong Peninsula<br>(SP)                                | (Temperate monsoon<br>climate)                                  | 15.7                                       | 8309.6           | 98.5                    |
| Northwest China                                           |                                                                 |                                            |                  |                         |
| Guanzhong Plain<br>(GZP)                                  | (Warm temperate<br>continental monsoon<br>climate)              | 10.7                                       | 2550.7           | 39.4                    |
| North-central Tohoku Plain                                |                                                                 |                                            |                  |                         |
| Ha-Chang<br>(HC)                                          | (Temperate monsoon<br>climate)                                  | 26.4                                       | 2257.6           | 39.5                    |
| South-central Liaoning                                    |                                                                 |                                            |                  |                         |
| Mid-Southern Liaoning<br>(MSL)                            | (Temperate monsoon<br>climate)                                  | 8.3                                        | 2308.8           | 31.1                    |

Data source: China Statistical Yearbook 2021.

**Supplementary Table S2.** Multicollinearity test for AOD influence variables: variance inflation factor (VIF)

| PM2.5 | NDVI  | LST    | PD    | GDP   | DEM   | Slope | WS    | Prcp  | Tmp    | RH    |
|-------|-------|--------|-------|-------|-------|-------|-------|-------|--------|-------|
| 2.478 | 2.677 | 30.141 | 3.133 | 3.848 | 2.589 | 1.271 | 1.674 | 4.327 | 43.944 | 9.622 |

PM2.5: particulate matter with an aerodynamic diameter less than 2.5  $\mu\text{m}$ , NDVI: normalized differential vegetation index, LST: land surface temperature, PD: population density, GDP: gross domestic product, DEM: digital elevation model, Slope: slope, WS: wind speed, Prcp: precipitation, Tmp: temperature, RH: relative humidity.

## References

1. Du, H.; Zhan, W.; Voogt, J.; Bechtel, B.; Chakraborty, T.C.; Liu, Z.; Hu, L.; Wang, Z.; Li, J.; Fu, P.; et al. Contrasting Trends and Drivers of Global Surface and Canopy Urban Heat Islands. *Geophysical Research Letters* **2023**, *50*, doi:10.1029/2023gl104661.
2. Boersma, J.; Glasser, M.L. A differentiation formula for spherical Bessel functions. *Journal of Physics A: Mathematical and General* **2005**, *38*, 1687, doi:10.1088/0305-4470/38/8/005.
3. Ye, X.; Xiao, X.; Shi, J.; Ling, M. The new concepts of measurement error theory. *Measurement* **2016**, *83*, 96-105, doi:10.1016/j.measurement.2016.01.038.
4. Du, H.; Zhan, W.; Liu, Z.; Li, J.; Li, L.; Lai, J.; Miao, S.; Huang, F.; Wang, C.; Wang, C.; et al. Simultaneous investigation of surface and canopy urban heat islands over global cities. *ISPRS Journal of Photogrammetry and Remote Sensing* **2021**, *181*, 67-83, doi:10.1016/j.isprsjprs.2021.09.003.
